# Supplementary material for: Microchip Immunoassays for Monitoring Renal Function: Rapid, Low-Cost, and Highly Sensitive Quantification of Urinary Biomarkers of Diabetic Nephropathy
Source: MDPI journal article supplement (doi:10.3390/mi12111353), 2021-10-31
Supplement: s1 [file s1]

# Microchip Immunoassays for Monitoring Renal Function: Rapid, Low-Cost, and Highly Sensitive Quantification of Urinary Biomarkers of Diabetic Nephropathy

Toshihiro Kasama <sup>1,2,\*</sup>, Miaomiao Sun <sup>3</sup>, Noritada Kaji <sup>2,4</sup>, Shin-ichi Akiyama <sup>5</sup>, Yukio Yuzawa <sup>6</sup>, Manabu Tokeshi <sup>2,7</sup>, Seiichi Matsuo <sup>5</sup> and Yoshinobu Baba <sup>2,3,8</sup>

<sup>1</sup> Department of Bioengineering, Graduate School of Engineering, The University of Tokyo, Tokyo 113-8654, Japan  
<sup>2</sup> Institute of Nano-Life-Systems, Institutes of Innovation for Future Society, Nagoya University, Aichi 464-8603, Japan  
<sup>3</sup> Department of Biomolecular Engineering, Graduate School of Engineering, Nagoya University, Aichi 464-8603, Japan  
<sup>4</sup> Department of Applied Chemistry, Faculty of Engineering, Kyushu University, Fukuoka 819-0395, Japan  
<sup>5</sup> Division of Nephrology, Department of Internal Medicine, Nagoya University Graduate School of Medicine, Aichi 466-8550, Japan  
<sup>6</sup> Department of Nephrology, Fujita Health University, Aichi 470-1192, Japan  
<sup>7</sup> Division of Applied Chemistry, Faculty of Engineering, Hokkaido University, Hokkaido 060-0808, Japan  
<sup>8</sup> Health Research Institute, National Institute of Advanced Industrial Science and Technology, Kagawa 761- 0395, Japan  
\* Correspondence: kasama.toshihiro@kk.alumni.u-tokyo.ac.jp

Table S1. Patient characteristics and immunoassay results.

| No. | Age | Sex | Stage of diabetic nephropathy | Concentration of MCP-1 (ng/mL) |                        |
|-----|-----|-----|-------------------------------|--------------------------------|------------------------|
|     |     |     |                               | ELISA                          | Immuno-pillar analysis |
| 1   | 72  | M   | 4                             | 1.38                           | 2.06                   |
| 2   | 53  | M   | 4                             | 0.83                           | 0.95                   |
| 3   | 65  | F   | 3A                            | 1.20                           | 1.90                   |
| 4   | 82  | F   | 3A                            | 0.34                           | 0.52                   |
| 5   | 71  | M   | 2                             | 0.48                           | 0.68                   |
| 6   | 58  | M   | 0                             | 0.10                           | 0.05                   |
| 7   | 32  | F   | 0                             | 0.03                           | 0.001                  |

| No. | Age | Sex | Stage of diabetic nephropathy | Concentration of AGT (ng/mL) |                        |
|-----|-----|-----|-------------------------------|------------------------------|------------------------|
|     |     |     |                               | ELISA                        | Immuno-pillar analysis |
| 8   | 69  | M   | 4                             | 32.8                         | 37.0                   |
| 9   | 53  | M   | 4                             | 22.4                         | 24.6                   |
| 10  | 68  | F   | 3A                            | 10.6                         | 6.33                   |
| 11  | 65  | F   | 3A                            | 5.25                         | 2.58                   |
| 12  | 71  | M   | 2                             | 0.28                         | 0.34                   |
| 13  | 48  | F   | 1                             | 1.32                         | 0.94                   |

|    |    |   |   |      |      |
|----|----|---|---|------|------|
| 14 | 55 | F | 1 | 0.09 | 0.08 |
| 15 | 69 | F | 1 | 0.02 | 0.02 |
| 16 | 58 | F | 0 | 0.49 | 0.33 |
| 17 | 58 | M | 0 | 2.12 | 2.50 |

| No. | Age | Sex | Stage of diabetic nephropathy | Concentration of L-FABP (ng/mL) |                        |
|-----|-----|-----|-------------------------------|---------------------------------|------------------------|
|     |     |     |                               | ELISA                           | Immuno-pillar analysis |
| 18  | 72  | M   | 4                             | 138.5                           | 130.8                  |
| 19  | 69  | M   | 4                             | 91.5                            | 76.5                   |
| 20  | 53  | M   | 4                             | 65.0                            | 48.3                   |
| 21  | 77  | F   | 4                             | 46.2                            | 45.4                   |
| 22  | 72  | M   | 3A                            | 11.4                            | 11.4                   |
| 23  | 63  | M   | 2                             | 1.04                            | 0.50                   |
| 24  | 61  | M   | 1                             | 4.81                            | 4.65                   |
| 25  | 48  | F   | 1                             | 0.37                            | 0.48                   |
| 26  | 51  | F   | 0                             | 0.48                            | 0.50                   |
